# Supplementary material
Source: publisher site journal article supplement (http://static.cambridge.org/content/id/urn:cambridge.org:id:article:S1049023X19004874/resource/name/S1049023X19004874supp003.docx)
Supplement: Supplementary file 1 [file S1049023X19004874supp003.docx]

**Appendix 1.** Showing the Combined Search Strategy

| Medical responders OR medical respons* AND post traumatic stress disorder OR stress disorder post traumatic* AND disasters OR natural disasters OR man made disasters |
| --- |
| Emergency medical responders OR first res-ponders OR emergency responder* AND PTSD OR post traumatic stress disorder OR stress disorder post traumatic* AND disasters OR natural disasters OR man made disasters |
| Professional emergency responders AND PTSD OR post traumatic stress disorder OR stress disorder post traumatic* AND disasters OR natural disasters OR man made disasters* |
| Medical responders OR medical respons* AND neuroses post trauma OR stress disorder post traumatic* OR Depression AND disasters OR natural disasters OR manmade disasters* |
| Emergency medical res-ponders OR first responders OR emergency res-ponders AND AND neuroses post trauma OR stress disorders post traumatic*OR Depression OR neuroses AND disasters OR natural disasters OR manmade disasters* |
| Professional emergency res-ponders AND neuroses post trauma OR stress disorders post traumatic* OR Depression OR neuroses AND disasters OR natural disasters OR manmade disasters* |
| Medical responders OR medical respons* AND mental health disorders OR psychological illness OR mental health OR mental disorders AND disasters OR natural disasters OR manmade disasters* |
| Emergency medical res-ponders OR first responders OR emergency res-ponders AND mental health disorders OR psychological illness OR mental health OR mental disorders AND disasters OR natural disasters OR manmade disasters* |
| Professional emergency res-ponders AND mental health disorders OR psychological illness OR mental health OR mental disorders AND disasters OR natural disasters OR manmade disasters* |
| Medical responders OR medical respons* AND mental health out comes OR psychological impact AND disasters OR natural disasters OR man made disasters* |
| Emergency medical res-ponders OR first responders OR emergency res-ponders AND mental health out comes OR psychological impact AND disasters OR natural disasters OR man made disasters* |
| Professional emergency res-ponders AND mental health out comes OR psychological impact AND disasters OR natural disasters OR man made disasters* |
| Medical responders OR medical respons* OR Emergency medical responders OR first res-ponders OR emergency respond* AND substance abuse OR Drug abuse OR alcohol abuse OR Suicide AND disasters OR natural disasters OR man made disasters |
| Emergency doctors OR emergency nurses AND PTSD OR post traumatic stress disorder OR stress disorder post traumatic* OR depression OR neuroses AND disasters OR natural disasters OR man made disasters |
| Emergency doctors OR emergency nurses AND mental health disorders OR psychological illness OR mental health OR mental disorders OR mental health outcomes OR psychological impact AND disasters OR natural disasters OR man made disasters |
| Emergency doctors OR emergency nurses AND substance abuse OR Drug abuse OR alcohol abuse OR Suicide AND disasters OR natural disasters OR man made disasters |
| Ambulance personnel OR paramedics OR prehospital responders AND PTSD OR post traumatic stress disorder OR stress disorder post traumatic* OR depression OR neuroses AND disasters OR natural disasters OR man made disasters |
| Ambulance personnel OR paramedics OR prehospital responders AND mental health disorders OR psychological illness OR mental health OR mental disorders OR mental health outcomes OR psychological impact AND disasters OR natural disasters OR man made disasters |
| Ambulance personnel OR paramedics OR prehospital responders AND substance abuse OR Drug abuse OR alcohol abuse OR Suicide AND disasters OR natural disasters OR man made disasters |
| Medical responders OR medical respons* OR Emergency medical responders OR first res-ponders OR emergency respond* OR professional emergency responders AND AND PTSD OR post traumatic stress disorder OR stress disorder post traumatic* OR depression OR neuroses AND swine flu outbreak OR swine flu epidemic OR influenza epidemic OR H1N1 epidemic OR H1N1 infection |

**Appendix 2.** Showing the Combined Search

| Medical responders OR medical respons* OR Emergency medical responders OR first res-ponders OR emergency respond* OR professional emergency responders AND mental health disorders OR psychological illness OR mental health OR mental disorders OR mental health outcomes OR psychological impact AND swine flu outbreak OR swine flu epidemic OR influenza epidemic OR H1N1 epidemic OR H1N1 infection |
| --- |
| Medical responders OR medical respons* OR Emergency medical responders OR first res-ponders OR emergency respond* OR professional emergency responders AND substance abuse OR Drug abuse OR alcohol abuse OR Suicide AND swine flu outbreak OR swine flu epidemic OR influenza epidemic OR H1N1 epidemic OR H1N1 infection |
| Medical responders OR medical respons* OR Emergency medical responders OR first res-ponders OR emergency respond* OR professional emergency responders AND PTSD OR post traumatic stress disorder OR stress disorder post traumatic* OR depression OR neuroses AND MERS OR MERS outbreak OR MERS epidemic OR middle east respiratory syndrome* OR middle east respiratory syndrome outbreak OR corona virus infection OR corona virus epidemic |
| Medical responders OR medical respons* OR Emergency medical responders OR first res-ponders OR emergency respond* OR professional emergency responders AND mental health disorders OR psychological illness OR mental health OR mental disorders OR mental health outcomes OR psychological impact OR middle east respiratory syndrome* OR middle east respiratory syndrome outbreak OR corona virus infection OR corona virus epidemic |
| Medical responders OR medical respons* OR Emergency medical responders OR first res-ponders OR emergency respond* OR professional emergency responders AND substance abuse OR Drug abuse OR alcohol abuse OR Suicide OR middle east respiratory syndrome* OR middle east respiratory syndrome outbreak OR corona virus infection OR corona virus epidemic |
| Emergency doctors OR emergency nurses OR Ambulance personnel OR paramedics OR prehospital responders AND PTSD OR post traumatic stress disorder OR stress disorder post traumatic* OR depression OR neuroses post trauma OR neurosis AND middle east respiratory syndrome* OR middle east respiratory syndrome outbreak OR corona virus infection OR corona virus epidemic |
| Emergency doctors OR emergency nurses OR Ambulance personnel OR paramedics OR prehospital responders AND mental health disorders OR psychological illness OR mental health OR mental disorders OR mental health outcomes OR psychological impact AND middle east respiratory syndrome* OR middle east respiratory syndrome outbreak OR corona virus infection OR corona virus epidemic |
| Emergency doctors OR emergency nurses OR Ambulance personnel OR paramedics OR prehospital responders AND substance abuse OR Drug abuse OR alcohol abuse OR Suicide AND middle east respiratory syndrome* OR middle east respiratory syndrome outbreak OR corona virus infection OR corona virus epidemic |
| Medical responders OR medical respons* OR Emergency medical responders OR first res-ponders OR emergency respond* OR professional emergency responders AND PTSD OR post traumatic stress disorder OR stress disorder post traumatic* OR depression OR neuroses post trauma OR neurosis AND SARS OR severe acute respiratory syndrome* OR SARS outbreak OR Zika virus infection OR Zika virus epidemic* OR ebola outbreak OR ebola epidemic |
| Medical responders OR medical respons* OR Emergency medical responders OR first res-ponders OR emergency respond* OR professional emergency responders responders AND mental health disorders OR psychological illness OR mental health OR mental disorders OR mental health outcomes OR psychological impact AND SARS OR severe acute respiratory syndrome* OR SARS outbreak OR Zika virus infection OR Zika virus epidemic* OR ebola outbreak OR ebola epidemic |
| Medical responders OR medical respons* OR Emergency medical responders OR first res-ponders OR emergency respond* OR professional emergency responders AND substance abuse OR Drug abuse OR alcohol abuse OR Suicide ANDSARS OR severe acute respiratory syndrome* OR SARS outbreak OR Zika virus infection OR Zika virus epidemic* OR ebola outbreak OR ebola epidemic |
| Emergency doctors OR emergency nurses OR Ambulance personnel OR paramedics OR prehospital responders AND PTSD OR post traumatic stress disorder OR stress disorder post traumatic* OR depression OR neuroses post trauma OR neurosis AND SARS OR severe acute respiratory syndrome* OR SARS outbreak OR Zika virus infection OR Zika virus epidemic* OR ebola outbreak OR ebola epidemic |
| Emergency doctors OR emergency nurses OR Ambulance personnel OR paramedics OR prehospital responders AND mental health disorders OR psychological illness OR mental health OR mental disorders OR mental health outcomes OR psychological impact AND SARS OR severe acute respiratory syndrome* OR SARS outbreak OR Zika virus infection OR Zika virus epidemic* OR ebola outbreak OR ebola epidemic |
| Emergency doctors OR emergency nurses OR Ambulance personnel OR paramedics OR prehospital responders AND substance abuse OR Drug abuse OR alcohol abuse OR Suicide SARS OR severe acute respiratory syndrome* OR SARS outbreak OR Zika virus infection OR Zika virus epidemic* OR ebola outbreak OR ebola epidemic |
| Medical responders OR medical respons* OR Emergency medical responders OR first res-ponders OR emergency respond* OR professional emergency responders AND PTSD OR post traumatic stress disorder OR stress disorder post traumatic* OR depression OR neuroses post trauma OR neurosis AND earth quake OR tsunami OR cyclone OR heat wave OR wild fires OR forest fires OR floods OR land slides OR hurricane OR tornado |
| Medical responders OR medical respons* OR Emergency medical responders OR first res-ponders OR emergency respond* OR professional emergency responders responders AND mental health disorders OR psychological illness OR mental health OR mental disorders OR mental health outcomes OR psychological impact AND earth quake OR tsunami OR cyclone OR heat wave OR wild fires OR forest fires OR floods OR land slides OR hurricane OR tornado |
| Medical responders OR medical respons* OR Emergency medical responders OR first res-ponders OR emergency respond* OR professional emergency responders AND substance abuse OR Drug abuse OR alcohol abuse OR Suicide AND earth quake OR tsunami OR cyclone OR heat wave OR wild fires OR forest fires OR floods OR land slides OR hurricane OR tornado |
| Emergency doctors OR emergency nurses OR Ambulance personnel OR paramedics OR prehospital responders AND PTSD OR post traumatic stress disorder OR stress disorder post traumatic* OR depression OR neuroses post trauma OR neurosis AND earth quake OR tsunami OR cyclone OR heat wave OR wild fires OR forest fires OR floods OR land slides OR hurricane OR tornado |
| Emergency doctors OR emergency nurses OR Ambulance personnel OR paramedics OR prehospital responders AND mental health disorders OR psychological illness OR mental health OR mental disorders OR mental health outcomes OR psychological impact AND earth quake OR tsunami OR cyclone OR heat wave OR wild fires OR forest fires OR floods OR land slides OR hurricane OR tornado |
| Emergency doctors OR emergency nurses OR Ambulance personnel OR paramedics OR prehospital responders AND substance abuse OR Drug abuse OR alcohol abuse OR Suicide AND earth quake OR tsunami OR cyclone OR heat wave OR wild fires OR forest fires OR floods OR land slides OR hurricane OR tornado |
| Medical responders OR medical respons* OR Emergency medical responders OR first res-ponders OR emergency respond* OR professional emergency responders AND PTSD OR post traumatic stress disorder OR stress disorder post traumatic* OR depression OR neuroses post trauma OR neurosis AND Haiti earth quake OR Indian ocean tsunami OR Bangladesh cyclone OR cyclone nargis OR Pakistan earth quake OR Iran earth quake OR columbian earth quake OR Japan earth quake OR China Earth quake OR Turkey earth quake OR Nepal earth quake OR Gujarath earth quake OR European heat wave OR south asian floods OR Afhghanistan earth quake OR Kashmir earth quake OR Russian heat waves or wild fires |
| Medical responders OR medical respons* OR Emergency medical responders OR first res-ponders OR emergency respond* OR professional emergency responders responders AND mental health disorders OR psychological illness OR mental health OR mental disorders OR mental health outcomes OR psychological impact AND Haiti earth quake OR Indian ocean tsunami OR Bangladesh cyclone OR cyclone nargis OR Pakistan earth quake OR Iran earth quake OR columbian earth quake OR Japan earth quake OR China Earth quake OR Turkey earth quake OR Nepal earth quake OR Gujarath earth quake OR European heat wave OR south asian floods OR Afhghanistan earth quake OR Kashmir earth quake OR Russian heat waves or wild fires |
| Medical responders OR medical respons* OR Emergency medical responders OR first res-ponders OR emergency respond* OR professional emergency responders AND substance abuse OR Drug abuse OR alcohol abuse OR Suicide AND Haiti earth quake OR Indian ocean tsunami OR Bangladesh cyclone OR cyclone nargis OR Pakistan earth quake OR Iran earth quake OR columbian earth quake OR Japan earth quake OR China Earth quake OR Turkey earth quake OR Nepal earth quake OR Gujarath earth quake OR European heat wave OR south asian floods OR Afhghanistan earth quake OR Kashmir earth quake OR Russian heat waves or wild fires |
| Medical responders OR medical respons* OR Emergency medical responders OR first res-ponders OR emergency respond* OR professional emergency responders AND PTSD OR post traumatic stress disorder OR stress disorder post traumatic* OR depression OR neuroses post trauma OR neurosis AND Hurricane Mathew OR Hurricane Sandy OR Hurricane Katrina OR Hurricane Rita OR Hurricane Ivan OR heat wave Chicago OR tornado Joplin OR hurricane Mitch OR Cyclone Aila |
| Medical responders OR medical respons* OR Emergency medical responders OR first res-ponders OR emergency respond* OR professional emergency responders responders AND mental health disorders OR psychological illness OR mental health OR mental disorders OR mental health outcomes OR psychological impact AND Hurricane Mathew OR Hurricane Sandy OR Hurricane Katrina OR Hurricane Rita OR Hurricane Ivan OR heat wave Chicago OR tornado Joplin OR hurricane Mitch OR Cyclone Aila |
| Medical responders OR medical respons* OR Emergency medical responders OR first res-ponders OR emergency respond* OR professional emergency responders AND substance abuse OR Drug abuse OR alcohol abuse OR Suicide AND Hurricane Mathew OR Hurricane Sandy OR Hurricane Katrina OR Hurricane Rita OR Hurricane Ivan OR heat wave Chicago OR tornado Joplin OR hurricane Mitch OR Cyclone Aila |
| Emergency doctors OR emergency nurses OR Ambulance personnel OR paramedics OR prehospital responders AND PTSD OR post traumatic stress disorder OR stress disorder post traumatic* OR depression OR neuroses post trauma OR neurosis AND Haiti earth quake OR Indian ocean tsunami OR Bangladesh cyclone OR cyclone nargis OR Pakistan earth quake OR Iran earth quake OR columbian earth quake OR Japan earth quake OR China Earth quake OR Turkey earth quake OR Nepal earth quake OR Gujarath earth quake OR European heat wave OR south asian floods OR Afhghanistan earth quake OR Kashmir earth quake OR Russian heat waves or wild fires |
| Emergency doctors OR emergency nurses OR Ambulance personnel OR paramedics OR prehospital responders AND mental health disorders OR psychological illness OR mental health OR mental disorders OR mental health outcomes OR psychological impact AND Haiti earth quake OR Indian ocean tsunami OR Bangladesh cyclone OR cyclone nargis OR Pakistan earth quake OR Iran earth quake OR columbian earth quake OR Japan earth quake OR China Earth quake OR Turkey earth quake OR Nepal earth quake OR Gujarath earth quake OR European heat wave OR south asian floods OR Afhghanistan earth quake OR Kashmir earth quake OR Russian heat waves or wild fires |
| Emergency doctors OR emergency nurses OR Ambulance personnel OR paramedics OR prehospital responders AND substance abuse OR Drug abuse OR alcohol abuse OR Suicide AND Haiti earth quake OR Indian ocean tsunami OR Bangladesh cyclone OR cyclone nargis OR Pakistan earth quake OR Iran earth quake OR columbian earth quake OR Japan earth quake OR China Earth quake OR Turkey earth quake OR Nepal earth quake OR Gujarath earth quake OR European heat wave OR south asian floods OR Afhghanistan earth quake OR Kashmir earth quake OR Russian heat waves or wild fires |
| Emergency doctors OR emergency nurses OR Ambulance personnel OR paramedics OR prehospital responders AND PTSD OR post traumatic stress disorder OR stress disorder post traumatic* OR depression OR neuroses post trauma OR neurosis AND Hurricane Mathew OR Hurricane Sandy OR Hurricane Katrina OR Hurricane Rita OR Hurricane Ivan OR heat wave Chicago OR tornado Joplin OR hurricane Mitch OR Cyclone Aila |
| Emergency doctors OR emergency nurses OR Ambulance personnel OR paramedics OR prehospital responders AND mental health disorders OR psychological illness OR mental health OR mental disorders OR mental health outcomes OR psychological impact AND Hurricane Mathew OR Hurricane Sandy OR Hurricane Katrina OR Hurricane Rita OR Hurricane Ivan OR heat wave Chicago OR tornado Joplin OR hurricane Mitch OR Cyclone Aila |
| Emergency doctors OR emergency nurses OR Ambulance personnel OR paramedics OR prehospital responders AND substance abuse OR Drug abuse OR alcohol abuse OR Suicide AND Hurricane Mathew OR Hurricane Sandy OR Hurricane Katrina OR Hurricane Rita OR Hurricane Ivan OR heat wave Chicago OR tornado Joplin OR hurricane Mitch OR Cyclone Aila |
| Medical responders OR medical respons* OR Emergency medical responders OR first res-ponders OR emergency respond* OR professional emergency responders AND PTSD OR post traumatic stress disorder OR stress disorder post traumatic* OR depression OR neuroses post trauma OR neurosis AND Fukushima nuclear disaster OR Japan nuclear disaster OR Chernobyl nuclear disaster OR Bhopal gas tragedy |
| Medical responders OR medical respons* OR Emergency medical responders OR first res-ponders OR emergency respond* OR professional emergency responders responders AND mental health disorders OR psychological illness OR mental health OR mental disorders OR mental health outcomes OR psychological impact AND Fukushima nuclear disaster OR Japan nuclear disaster OR Chernobyl nuclear disaster OR Bhopal gas tragedy |
| Medical responders OR medical respons* OR Emergency medical responders OR first res-ponders OR emergency respond* OR professional emergency responders AND substance abuse OR Drug abuse OR alcohol abuse OR Suicide AND Fukushima nuclear disaster OR Japan nuclear disaster OR Chernobyl nuclear disaster OR Bhopal gas tragedy |
| Emergency doctors OR emergency nurses OR Ambulance personnel OR paramedics OR prehospital responders AND PTSD OR post traumatic stress disorder OR stress disorder post traumatic* OR depression OR neuroses post trauma OR neurosis AND Fukushima nuclear disaster OR Japan nuclear disaster OR Chernobyl nuclear disaster OR Bhopal gas tragedy |
| Emergency doctors OR emergency nurses OR Ambulance personnel OR paramedics OR prehospital responders AND mental health disorders OR psychological illness OR mental health OR mental disorders OR mental health outcomes OR psychological impact AND Fukushima nuclear disaster OR Japan nuclear disaster OR Chernobyl nuclear disaster OR Bhopal gas tragedy |
| Emergency doctors OR emergency nurses OR Ambulance personnel OR paramedics OR prehospital responders AND substance abuse OR Drug abuse OR alcohol abuse OR Suicide AND Fukushima nuclear disaster OR Japan nuclear disaster OR Chernobyl nuclear disaster OR Bhopal gas tragedy |
| Medical responders OR medical respons* OR Emergency medical responders OR first res-ponders OR emergency respond* OR professional emergency responders AND PTSD OR post traumatic stress disorder OR stress disorder post traumatic* OR depression OR neuroses post trauma OR neurosis AND terrorist attack OR terrorism OR mass shooting OR kidnapping OR hostage crisis OR bombing* OR bus bombing OR train bombing OR metro bombing OR airplane bombing OR airplane crash* OR bioterrorism OR road traffic accident |
| Medical responders OR medical respons* OR Emergency medical responders OR first res-ponders OR emergency respond* OR professional emergency responders responders AND mental health disorders OR psychological illness OR mental health OR mental disorders OR mental health outcomes OR psychological impact AND terrorist attack OR terrorism OR mass shooting OR kidnapping OR hostage crisis OR bombing* OR bus bombing OR train bombing OR metro bombing OR airplane bombing OR airplane crash* OR bioterrorism OR road traffic accident |
| Medical responders OR medical respons* OR Emergency medical responders OR first res-ponders OR emergency respond* OR professional emergency responders AND substance abuse OR Drug abuse OR alcohol abuse OR Suicide AND terrorist attack OR terrorism OR mass shooting OR kidnapping OR hostage crisis OR bombing* OR bus bombing OR train bombing OR metro bombing OR airplane bombing OR airplane crash* OR bioterrorism OR road traffic accident |
| Emergency doctors OR emergency nurses OR Ambulance personnel OR paramedics OR prehospital responders AND PTSD OR post traumatic stress disorder OR stress disorder post traumatic* OR depression OR neuroses post trauma OR neurosis AND terrorist attack OR terrorism OR mass shooting OR kidnapping OR hostage crisis OR bombing* OR bus bombing OR train bombing OR metro bombing OR airplane bombing OR airplane crash* OR bioterrorism OR road traffic accident |
| Emergency doctors OR emergency nurses OR Ambulance personnel OR paramedics OR prehospital responders AND mental health disorders OR psychological illness OR mental health OR mental disorders OR mental health outcomes OR psychological impact AND terrorist attack OR terrorism OR mass shooting OR kidnapping OR hostage crisis OR bombing* OR bus bombing OR train bombing OR metro bombing OR airplane bombing OR airplane crash* OR bioterrorism OR road traffic accident |
| Emergency doctors OR emergency nurses OR Ambulance personnel OR paramedics OR prehospital responders AND substance abuse OR Drug abuse OR alcohol abuse OR Suicide AND terrorist attack OR terrorism OR mass shooting OR kidnapping OR hostage crisis OR bombing* OR bus bombing OR train bombing OR metro bombing OR airplane bombing OR airplane crash* OR bioterrorism OR road traffic accident |
| Emergency doctors OR emergency nurses OR Ambulance personnel OR paramedics OR prehospital responders AND PTSD OR post traumatic stress disorder OR stress disorder post traumatic* OR depression OR neuroses post trauma OR neurosis AND September 9/11 attack OR WTC attack OR world trade centre attack OR Belgium shooting OR US mass shooting OR France bostile attack OR Germany Berlin terrorist attack OR Brussels shooting incident OR Sydney hostage* OR France hostage crisis OR Copenhagen shooting OR Mumbai blast OR Mumbai terrorist attack OR Sweden Stockholm terrorist attack OR London bombing OR Madrid train bombing OR Beslan school hostage OR Isthanbul bombing OR Russian bombing OR Telaviv massacre OR Turkey bombing OR Jerusalem bus bombing OR Russia airport attack OR Bali bombing OR Norway shooting |
| Emergency doctors OR emergency nurses OR Ambulance personnel OR paramedics OR prehospital responders AND mental health disorders OR psychological illness OR mental health OR mental disorders OR mental health outcomes OR psychological impact AND AND September 9/11 attack OR WTC attack OR world trade centre attack OR Belgium shooting OR US mass shooting OR France bostile attack OR Germany Berlin terrorist attack OR Brussels shooting incident OR Sydney hostage* OR France hostage crisis OR Copenhagen shooting OR Mumbai blast OR Mumbai terrorist attack OR Sweden Stockholm terrorist attack OR London bombing OR Madrid train bombing OR Beslan school hostage OR Isthanbul bombing OR Russian bombing OR Telaviv massacre OR Turkey bombing OR Jerusalem bus bombing OR Russia airport attack OR Bali bombing OR Norway shooting |
| Emergency doctors OR emergency nurses OR Ambulance personnel OR paramedics OR prehospital responders AND substance abuse OR Drug abuse OR alcohol abuse OR Suicide AND AND September 9/11 attack OR WTC attack OR world trade centre attack OR Belgium shooting OR US mass shooting OR France bostile attack OR Germany Berlin terrorist attack OR Brussels shooting incident OR Sydney hostage* OR France hostage crisis OR Copenhagen shooting OR Mumbai blast OR Mumbai terrorist attack OR Sweden Stockholm terrorist attack OR London bombing OR Madrid train bombing OR Beslan school hostage OR Isthanbul bombing OR Russian bombing OR Telaviv massacre OR Turkey bombing OR Jerusalem bus bombing OR Russia airport attack OR Bali bombing OR Norway shooting |
| Medical responders OR medical respons* OR Emergency medical responders OR first res-ponders OR emergency respond* OR professional emergency responders AND PTSD OR post traumatic stress disorder OR stress disorder post traumatic* OR depression OR neuroses post trauma OR neurosis AND September 9/11 attack OR WTC attack OR world trade centre attack OR Belgium shooting OR US mass shooting OR France bostile attack OR Germany Berlin terrorist attack OR Brussels shooting incident OR Sydney hostage* OR France hostage crisis OR Copenhagen shooting OR Mumbai blast OR Mumbai terrorist attack OR Sweden Stockholm terrorist attack OR London bombing OR Madrid train bombing OR Beslan school hostage OR Isthanbul bombing OR Russian bombing OR Telaviv massacre OR Turkey bombing OR Jerusalem bus bombing OR Russia airport attack OR Bali bombing OR Norway shooting |
| Medical responders OR medical respons* OR Emergency medical responders OR first res-ponders OR emergency respond* OR professional emergency responders responders AND mental health disorders OR psychological illness OR mental health OR mental disorders OR mental health outcomes OR psychological impact AND September 9/11 attack OR WTC attack OR world trade centre attack OR Belgium shooting OR US mass shooting OR France bostile attack OR Germany Berlin terrorist attack OR Brussels shooting incident OR Sydney hostage* OR France hostage crisis OR Copenhagen shooting OR Mumbai blast OR Mumbai terrorist attack OR Sweden Stockholm terrorist attack OR London bombing OR Madrid train bombing OR Beslan school hostage OR Isthanbul bombing OR Russian bombing OR Telaviv massacre OR Turkey bombing OR Jerusalem bus bombing OR Russia airport attack OR Bali bombing OR Norway shooting |
| Medical responders OR medical respons* OR Emergency medical responders OR first res-ponders OR emergency respond* OR professional emergency responders AND substance abuse OR Drug abuse OR alcohol abuse OR Suicide AND September 9/11 attack OR WTC attack OR world trade centre attack OR Belgium shooting OR US mass shooting OR France bostile attack OR Germany Berlin terrorist attack OR Brussels shooting incident OR Sydney hostage* OR France hostage crisis OR Copenhagen shooting OR Mumbai blast OR Mumbai terrorist attack OR Sweden Stockholm terrorist attack OR London bombing OR Madrid train bombing OR Beslan school hostage OR Isthanbul bombing OR Russian bombing OR Telaviv massacre OR Turkey bombing OR Jerusalem bus bombing OR Russia airport attack OR Bali bombing OR Norway shooting |
| Medical responders OR medical respons* OR Emergency medical responders OR first res-ponders OR emergency respond* OR professional emergency responders AND PTSD OR post traumatic stress disorder OR stress disorder post traumatic* OR depression OR neuroses post trauma OR neurosis AND war OR wars OR world war OR Iraq war OR warfare OR Gulf war OR war exposure OR Syrian war OR Lebanon war OR middle east war OR Arab spring OR Libyan war OR Israel war OR Israel Palestine war OR Gaza war |
| Medical responders OR medical respons* OR Emergency medical responders OR first res-ponders OR emergency respond* OR professional emergency responders responders AND mental health disorders OR psychological illness OR mental health OR mental disorders OR mental health outcomes OR psychological impact AND war OR wars OR world war OR Iraq war OR warfare OR Gulf war OR war exposure OR Syrian war OR Lebanon war OR middle east war OR Arab spring OR Libyan war OR Israel war OR Israel Palestine war OR Gaza war |
| Medical responders OR medical respons* OR Emergency medical responders OR first res-ponders OR emergency respond* OR professional emergency responders AND substance abuse OR Drug abuse OR alcohol abuse OR Suicide war OR wars OR world war OR Iraq war OR warfare OR Gulf war OR war exposure OR Syrian war OR Lebanon war OR middle east war OR Arab spring OR Libyan war OR Israel war OR Israel Palestine war OR Gaza war |
| Emergency doctors OR emergency nurses OR Ambulance personnel OR paramedics OR prehospital responders AND PTSD OR post traumatic stress disorder OR stress disorder post traumatic* OR depression OR neuroses post trauma OR neurosis AND war OR wars OR world war OR Iraq war OR warfare OR Gulf war OR war exposure OR Syrian war OR Lebanon war OR middle east war OR Arab spring OR Libyan war OR Israel war OR Israel Palestine war OR Gaza war |
| Emergency doctors OR emergency nurses OR Ambulance personnel OR paramedics OR prehospital responders AND mental health disorders OR psychological illness OR mental health OR mental disorders OR mental health outcomes OR psychological impact AND war OR wars OR world war OR Iraq war OR warfare OR Gulf war OR war exposure OR Syrian war OR Lebanon war OR middle east war OR Arab spring OR Libyan war OR Israel war OR Israel Palestine war OR Gaza war |
| Emergency doctors OR emergency nurses OR Ambulance personnel OR paramedics OR prehospital responders AND substance abuse OR Drug abuse OR alcohol abuse OR Suicide AND AND war OR wars OR world war OR Iraq war OR warfare OR Gulf war OR war exposure OR Syrian war OR Lebanon war OR middle east war OR Arab spring OR Libyan war OR Israel war OR Israel Palestine war OR Gaza war |
